# Supplementary material for: The Impact of Transnasal Humidified Rapid Insufflation Ventilatory Exchange (THRIVE) on Intragastric Pressure During Anaesthesia Induction in Overweight Patients: A Randomized Controlled Trial
Source: Research Square preprint supplement (doi:10.21203/rs.3.rs-6848070/v1), 2025-08-11
Supplement: Supplementary file 1 [file 100c4eb8cb39d9c877b012bd.docx]

# Table of Contents – THRIVE Study Protocol

1. General Information

2. Background and Rationale

3. Study Objectives

3.1 Primary Objective

3.2 Secondary Objectives

4. Study Design

4.1 Overview

4.2 Setting and Duration

4.3 Randomization and Allocation

4.4 Blinding

4.5 Flow Diagram

5. Eligibility Criteria

5.1 Inclusion Criteria

5.2 Exclusion Criteria

6. Interventions

6.1 Standardized Anesthesia and Gastric Pressure Monitoring

6.2 Group A: THRIVE

6.3 Group B: THRIVE + MASK

6.4 Group C: Conventional Mask Oxygenation

7. Outcome Measures

7.1 Primary Outcome

7.2 Secondary Outcomes

7.3 Safety Outcomes

8. Sample Size and Statistical Analysis

8.1 Sample Size Calculation

8.2 Statistical Analysis Plan

9. Adverse Events and Safety Monitoring

9.1 Definitions of Adverse Events

9.2 Monitoring Procedures

9.3 Serious Adverse Events (SAEs)

9.4 Safety Oversight

10. Ethical Considerations

10.1 Ethics Committee Approval

10.2 Informed Consent

10.3 Data Protection and Confidentiality

10.4 Dissemination of Results

11. Trial Administration and Quality Control

11.1 Study Team and Responsibilities

11.2 Monitoring and Auditing

11.3 Data Management

11.4 Study Documentation and Archiving

**1. General Information**

- **Study Title**
  *The Impact of Transnasal Humidified Rapid Insufflation Ventilatory Exchange (THRIVE) on Intragastric Pressure During Anaesthesia Induction in Overweight Patients: A Randomized Controlled Trial*
- **Protocol Version**
  Version 1.0
- **Principal Investigator**
  Mo Yunchang
- **Study Site**
  Department of Anesthesiology, The First Affiliated Hospital of Wenzhou Medical University, China
- **Study Design**
  Single-center, prospective, randomized, double-blind, controlled trial
- **Trial Duration**
  Estimated from August 2023 to January 2024
- **Sample Size**
  135 patients (details in Section 8)
- **Funding Source**
  None (Investigator-initiated)
- **Trial Registration**
  Chinese Clinical Trial Registry ChiCTR2300075652
- **Randomization & Blinding**
  - Computer-generated random codes
  - Participants and outcome assessors blinded
  - Large surgical towel and screen orientation used to ensure blinding of surgeons and anesthesiologists

**2. Background and Rationale**

Pulmonary aspiration remains a serious complication during anesthesia induction, particularly in overweight and obese patients, who are at higher risk due to delayed gastric emptying and increased intragastric pressure (IGP). Maintaining spontaneous respiration during anesthesia induction has been recommended as a strategy to reduce this risk. However, conventional oxygenation methods often fail to provide adequate support, especially in patients with high body mass index (BMI).

Transnasal Humidified Rapid Insufflation Ventilatory Exchange (THRIVE) is an oxygenation technique that delivers heated, humidified oxygen at high flow rates via nasal cannula. It not only extends the safe apnea time but also provides low-level positive airway pressure, potentially preventing gastric insufflation and reducing IGP.

Although THRIVE has been widely used in various clinical contexts, limited studies have explored its effect on intragastric pressure, especially during the critical period of anesthesia induction in overweight patients. Given the increasing prevalence of obesity and the heightened perioperative risk in this population, a better understanding of THRIVE’s physiological effects is clinically important.

This trial is designed to evaluate whether THRIVE reduces intragastric pressure in overweight patients during anesthesia induction, compared to conventional oxygenation methods. The results are expected to provide evidence to guide safe anesthetic practices and improve airway management strategies in this high-risk population.

**3. Study Objectives**

**3.1 Primary Objective**

- **To evaluate the effect of THRIVE compared to conventional oxygenation on intragastric pressure (IGP) during anesthesia induction in overweight patients.**

**3.2 Secondary Objectives**

- **To compare gastric antral cross-sectional area (CSA) before and after anesthesia induction across the three study groups.**
- **To compare changes in oxygen saturation (SpO₂), heart rate (HR), and mean arterial pressure (MAP) during induction among groups.**
- **To assess patient comfort and satisfaction with different oxygenation strategies.**
- **To determine the incidence of adverse events such as hypoxia, regurgitation, and aspiration.**

**4. Study Design**

**4.1 Overview**

This study is designed as a **prospective, single-center, randomized, double-blind, controlled trial**. A total of 135 overweight patients scheduled for elective surgery under general anesthesia will be randomly assigned to one of three groups:

- **Group A**: THRIVE;
- **Group B**: Combined Mask and THRIVE
- **Group C**: Conventional mask oxygenation.

**4.2 Setting and Duration**

The study will be conducted at the Department of Anesthesiology, The First Affiliated Hospital of Wenzhou Medical University, between **August 2023 and January 2024**.

**4.3 Randomization and Allocation**

Patients will be randomized in a 1:1:1 ratio using a computer-generated random sequence. The allocation will be concealed using sequentially numbered opaque sealed envelopes (SNOSE) prepared by an independent statistician.

**4.4 Blinding**

This is a **double-blind trial**:

- Patients and outcome assessors will be blinded to group assignment.
- The anesthesia team and surgeons will be blinded using:
  - A large surgical towel covering the upper body;
  - Positioning the monitor screen away from staff;
  - Group-specific THRIVE or mask setup performed behind curtain.

**4.5 Flow Diagram**


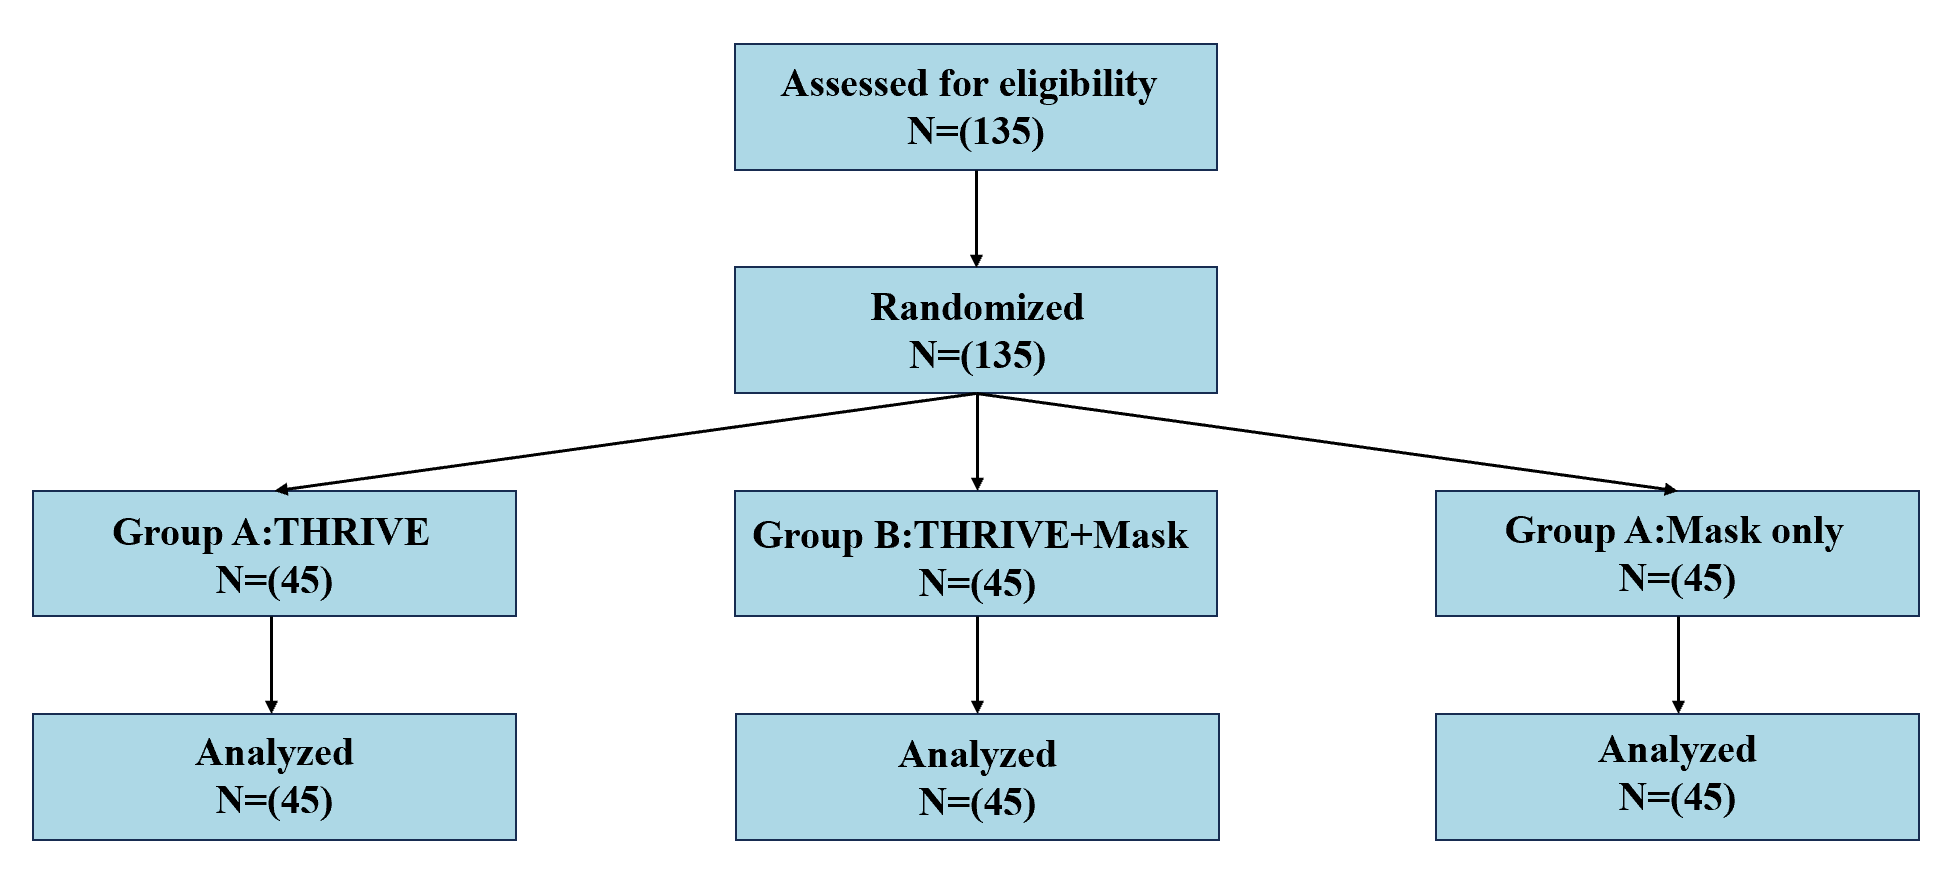


**5. Eligibility Criteria**

**5.1 Inclusion Criteria**

Patients must meet **all** of the following conditions to be eligible for the trial:

1. Age between **18 and 65 years**
2. Body Mass Index (BMI) ≥ **25.0 kg/m²**
3. Scheduled for **elective surgery under general anesthesia**
4. American Society of Anesthesiologists (ASA) physical status **I–II**
5. Provided **written informed consent**

**5.2 Exclusion Criteria**

Patients will be excluded if any of the following conditions are met:

1. Difficult airway or known risk of difficult intubation
2. Skull base fractures
3. Active bleeding in the airway or upper digestive tract, or with esophageal varices; pregnancy
4. Pregnancy or lactation
5. Severe gastroesophageal reflux disease
6. Neuromuscular disorders
7. ASA≥III

**6. Interventions**

This study consists of three intervention groups based on different oxygenation strategies during anesthesia induction. Each intervention is administered according to a standardized operating procedure (SOP) by a trained anesthesiology team member.

**6.1 Standardized Anesthesia Induction and Gastric Pressure Monitoring**

All patients will first undergo preoxygenation using a tight-fitting facemask delivering 100% oxygen at 8 L/min fresh gas flow, until end-tidal oxygen concentration (PEtO₂) exceeds 90%. Standard monitoring will be applied, including:

- Electrocardiography (ECG)
- Non-invasive blood pressure (NIBP)
- Heart rate (HR)
- Pulse oximetry (SpO₂)

Induction Medications

Induction will be achieved using:

- Propofol: 1.5–2.5 mg/kg
- Sufentanil: 0.2–0.4 μg/kg
- Rocuronium bromide: 0.3–0.6 mg/kg

In case of significant hemodynamic fluctuations during induction, appropriate vasopressors (e.g., phenylephrine or ephedrine) will be administered at the discretion of the attending anesthesiologist.

Gastric Pressure Measurement

After confirming loss of consciousness (disappearance of the eyelash reflex), a gastric pressure measurement tube will be inserted orally into the stomach under video laryngoscopic guidance in all patients. Correct positioning will be confirmed by aspiration of gastric fluid.

The tube will then be connected to a disposable pressure transducer, pre-calibrated to measure central venous pressure, and zeroed at the mid-axillary line.

**6.2 Group A: THRIVE**

- Patients receive transnasal high-flow nasal oxygen (THRIVE) at 60 L/min;
- Oxygen is heated and humidified to 37°C with 100% FiO₂;
- Airway patency was maintained using a chin lift or jaw thrust.
- THRIVE continues until successful endotracheal intubation;
- No mask ventilation is performed.

**6.2 Group B:** **Combined Mask and THRIVE (M+T Group)**

- Patients received THRIVE like GroupA.
- A face mask was loosely applied over the mouth and nose during oxygenation to simulate routine setup, but no positive pressure ventilation was performed;
- Oxygenation continued until successful intubation.

**6.3 Group C: Conventional Mask Oxygenation**

- Patients received a tightly held facemask and oxygenation was done by the PCV mode in anaesthesia machine (Pinsp = 15 cmH2O, TV = 8 L min-1, RR= 12 breaths per min with 100% oxygen) for 2 minutes.
- Manual mask ventilation is applied post-induction;
- No use of THRIVE.

**7. Outcome Measures**

**7.1 Primary Outcome**

- **Intragastric Pressure (IGP) measured during insertion and ventilation.**
  Measured in cmH₂O using a pressure transducer connected to a gastric tube, zeroed at the mid-axillary line.

**7.2 Secondary Outcomes**

1. **Gastric Antral Cross-sectional Area (CSA):**
   - Measured by ultrasound before and after anesthesia induction.
2. **Hemodynamic Parameters:**
   - Heart Rate (HR), Mean Arterial Pressure (MAP), SpO₂, PEtO₂, and PEtCO₂ at predefined timepoints.
3. **The degree of gastric insufflation:**
   - the surgeon graded gastric insufflation under direct laparoscopic visualization.

**7.3 Safety Outcomes**

- **Incidence of Hypoxia:**
  SpO₂ < 90% during induction
- **Regurgitation or Aspiration:**
  Presence of gastric fluid in oropharynx, larynx, or trachea
- **Hemodynamic Instability:**
  Defined as MAP change > 30% from baseline
- **Mucosal Trauma or Airway Complication:**
  Confirmed postoperatively by anesthesiologist or otolaryngologist

**8. Sample Size and Statistical Analysis**

**8.1 Sample Size Calculation**

Based on the pilot study results, the mean differences in intragastric pressure for groups M, T, and M+T were 0.6 mmHg, 0.2 mmHg, and 0.2 mmHg, respectively, with standard deviations of 0.49 mmHg, 0.4 mmHg, and 0.4 mmHg. Using GPower 3.1 software, with a Type I error rate (α) of 0.05 and power (1 - β) of 0.90, the calculated sample size was 30 patients per group. Considering the dropout rate, potential data collection failures, and the difficulties of gastric intubation, we decided to recruit at least 45 patients per group.

**8.2 Statistical Analysis Plan**

All statistical analyses will be performed using **SPSS 25.0**. The significance level will be set at **P < 0.05 (two-sided)**.

- **Normality tests** will be conducted using the **Shapiro–Wilk test**.
- **Continuous variables** will be presented as mean ± standard deviation (if normally distributed) or median (IQR), and compared using:
  - **One-way ANOVA** for normally distributed variables;
  - **Kruskal–Wallis test** for non-parametric data.
- **Categorical variables** will be analyzed using **Chi-square or Fisher’s exact test**.
- **Post-hoc analysis** with Bonferroni correction will be applied for multiple comparisons.

**9. Adverse Events and Safety Monitoring**

**9.1 Definitions of Adverse Events**

The following events will be classified and monitored as adverse events (AEs) in this study:

- **Hypoxia**
  Defined as SpO₂ < 90% for ≥10 seconds during induction.
- **Regurgitation or Aspiration**
  Presence of gastric fluid in the oropharynx, larynx, or trachea confirmed visually or by suction.
- **Hemodynamic Instability**
  Mean Arterial Pressure (MAP) decrease or increase >30% from baseline values.
- **Mucosal Trauma**
  Noted bleeding or abrasion during laryngoscopy or tube insertion.
- **Airway Complication**
  Laryngospasm, bronchospasm, or unanticipated difficult airway.

**9.2 Monitoring Procedures**

- All AEs will be recorded in the **Case Report Form (CRF)**, including time of occurrence, severity, duration, intervention measures, and resolution status.
- AEs will be classified by severity:
  ☐ Mild: No intervention required
  ☐ Moderate: Pharmacological or supportive intervention required
  ☐ Severe: Life-threatening or requiring advanced airway/rescue

**9.3 Serious Adverse Events (SAEs)**

- Any SAE will be reported to the hospital’s **ethics committee within 24 hours**, and appropriate documentation and treatment will be ensured.
- SAE criteria include:
  ☐ Death
  ☐ Life-threatening event
  ☐ Prolonged hospitalization
  ☐ Permanent damage

**9.4 Safety Oversight**

- A designated **independent safety monitor** (an attending anesthesiologist not involved in intervention) will review AE data weekly.
- Interim safety analysis will be performed if requested by the ethics board or sponsor.

**10. Ethical Considerations**

**10.1 Ethics Committee Approval**

This study has been reviewed and approved by the **Ethics Committee of The First Affiliated Hospital of Wenzhou Medical University** (Approval No.: to be provided). The trial will be conducted in full compliance with the **Declaration of Helsinki**, **ICH-GCP guidelines**, and local regulatory requirements.

**10.2 Informed Consent**

Prior to enrollment, all participants will receive detailed written and verbal information regarding:

- The study purpose and procedures;
- Potential risks and benefits;
- Voluntary participation and withdrawal rights;
- Confidentiality of data.

Participants will sign an **informed consent form** voluntarily before any study-related procedures begin.

**10.3 Data Protection and Confidentiality**

All participant data will be handled in accordance with applicable data protection regulations. Each subject will be assigned a unique ID number to de-identify personal information.

Study records will be stored in a **secure, password-protected database**, accessible only to authorized research personnel.

**10.4 Dissemination of Results**

The study findings will be submitted for publication in peer-reviewed scientific journals and may be presented at relevant academic conferences.

The trial registration number and protocol version will be included in all publications.

**11. Trial Administration and Quality Control**

**11.1 Study Team and Responsibilities**

The trial will be conducted by a designated research team including:

- **Principal Investigator (PI)**: responsible for overall study oversight, compliance, and final data integrity;
- **Co-investigators**: assist in patient recruitment, data collection, and clinical care;
- **Study nurse/coordinator**: handles CRF recording, informed consent process, and logistics;
- **Statistician**: performs sample size calculation, randomization, and data analysis.

**11.2 Monitoring and Auditing**

- The study will be **monitored regularly** by an internal audit team to ensure protocol adherence and data accuracy.
- Periodic checks will review:
  - CRF completeness and correctness
  - Informed consent documentation
  - AE reporting and follow-up

**11.3 Data Management**

- All data will be entered into **electronic CRFs (eCRF)** and backed up weekly.
- Data cleaning and query resolution will follow Good Clinical Practice (GCP) standards.

**11.4 Study Documentation and Archiving**

- All essential documents (consent forms, CRFs, protocol versions, approvals, etc.) will be archived securely for **at least 5 years** post-study completion.
- Access to archived data will be restricted to authorized personnel only.
